# Supplementary material
Source: PubMed Central journal article supplement (PMC3677504)
Supplement: 1300140110_pnas.201300140SI.pdf [file 1300140110_pnas.201300140SI.pdf]

# Supporting Information

Nakamura et al. 10.1073/pnas.1300140110

## SI Materials and Methods

**Natural Killer Cytotoxicity Assay.** Natural killer (NK) cytotoxicity assay was performed as previously described (1). In brief, target cells were labeled with  $\text{Na}_2^{51}\text{CrO}_4$  (PerkinElmer) at 37 °C for 1 h. Then, target cells were incubated with effector cells in 96-well round-bottom plates at indicated effector/target (E/T) ratios for 4 h. The percentage of specific  $^{51}\text{Cr}$  release was calculated as follows:  $100 \times (\text{experimental lysis} - \text{spontaneous lysis}) / (\text{maximal lysis} - \text{spontaneous lysis})$ .

**In Vitro NK Cell Death Assay.** IL-2-activated NK cells ( $1 \times 10^5$  per well) were labeled with 5-(and-6)-carboxyfluorescein diacetate succinimidyl ester (CFSE) (1  $\mu\text{M}$ ; Invitrogen), and then cocultured with target cells in indicated effector/target (E/T) ratios in 96-well round-bottom plates for 2 h at 37 °C. After coculture, cells were stained with anti-NK1.1 mAb (PK136; BioLegend) and propidium iodide (PI; Sigma). The percentage of PI-positive cells within the CFSE<sup>+</sup> NK1.1<sup>+</sup> population was measured on a FACSCanto II (BD Biosciences). For blocking assays, NK cells were pretreated with anti-CD16/CD32 mAb (2.4G2, 10  $\mu\text{g}/\text{mL}$ ; BD), and then incubated with the following mAb (10  $\mu\text{g}/\text{mL}$ ) for 30 min before coculture: anti-natural killer type 2 group D (NKG2D) (CX5; generated as previously described) (2), anti-Fas ligand (FasL) (Kay-10; BioLegend), anti-TNF-related apoptosis-inducing ligand (TRAIL) (N2B2; BioLegend), and anti-DNAX accessory molecule 1 (DNAM-1) (10E5; BioLegend).

**In Vivo NK Cell Death Assay.** CFSE-labeled wild type (WT) C57BL/6 NK cells ( $5 \times 10^6$ ) were cocultured with RMA or RMA stably expressing retinoic acid early inducible protein 1  $\delta$  (RMA/Rae-1 $\delta$ ) ( $5 \times 10^6$  each) for 15 min, and these cells were injected into spleen of recombination activating gene-1-deficient (Rag-1<sup>-/-</sup>) mice ( $n = 4$  each). After 4 h, splenocytes were stained with anti-NK1.1 mAb, and the percentage of CFSE<sup>+</sup> NK1.1<sup>+</sup> cells in whole splenocytes was calculated. To address the contribution of host NK cells to adoptively transferred NK cell death, CFSE-labeled NK1.1-negative BALB/c NK cells ( $5 \times 10^6$ ) cocultured with RMA or RMA/Rae-1 $\delta$  ( $5 \times 10^6$  each) were injected into spleen of WT C57BL/6 mice or NK-depleted C57BL/6 mice that had been intraperitoneally injected with anti-NK1.1 mAb (250  $\mu\text{g}/\text{mouse}$ ) 4 d before the adoptive transfer. At 4 h after the transfer, splenocytes were stained with anti-H-2K<sup>d</sup> mAb (SF1-1.1; BioLegend), and the percentage of CFSE<sup>+</sup> H-2K<sup>d</sup> cells in whole splenocytes was calculated.

**Stimulation of NKG2D Receptor.** Anti-NKG2D mAb (CX5) or control rat IgG were immobilized on 96-well flat-bottom plates by DOTAP (Sigma) at 10  $\mu\text{g}/\text{mL}$  as previously described (3). IL-2-activated NK cells ( $2 \times 10^5$  per well) pretreated with anti-CD16/CD32 mAb (2.4G2) were then added onto coated plates and cultured in growth medium with recombinant human IL-2 (100 units/mL) for the indicated periods. Then, NK cells were collected and cell death was analyzed by flow cytometry using PI. The amount of IFN- $\gamma$  in the culture supernatants was determined with the mouse IFN- $\gamma$  Femto-HS high-sensitivity ELISA kit (eBioscience), according to the manufacturer's instructions.

**In Vitro Trogocytosis Assay.** CFSE-labeled, IL-2-activated NK cells ( $1 \times 10^5$  per well) and target cells ( $1 \times 10^5$  per well) were cocultured in 96-well plates for indicated periods at 37 °C. Cells were pretreated with anti-CD16/CD32 mAb (2.4G2), and then

stained with allophycocyanin (APC)-conjugated pan-specific Rae-1 mAb (186107; R&D Systems). For the blocking assay using mAb, Fc-blocked cells were pretreated with the following mAb (10  $\mu\text{g}/\text{mL}$ ) before coculture: anti-NKG2D (CX5), anti-intercellular adhesion molecule-1 (ICAM-1) (KAT-1; eBioscience), anti-CD48 (HM48-1; BioLegend), and anti-2B4 [m2B4 (B6)4458.1; BioLegend]. IgG from rat serum (Sigma) was used as the control antibody. For blocking assays using chemical inhibitors, NK cells were incubated with the following reagents for 30 min before coculture: spleen tyrosine kinase (Syk) inhibitor piceatannol (12.5–100  $\mu\text{M}$ ; Wako), PI3-kinase inhibitor LY294002 (12.5–100  $\mu\text{M}$ ; Wako), mitogen-activated protein kinase (MEK)/extracellular signal-regulated kinase (ERK) inhibitor U0126 (12.5–50  $\mu\text{M}$ ; Wako), Src family kinase inhibitor PP2 (12.5–50  $\mu\text{M}$ ; Wako), actin polymerization inhibitor cytochalasin D (20  $\mu\text{M}$ ; Sigma), an inhibitor of clathrin-dependent endocytosis chlorpromazine (10  $\mu\text{g}/\text{mL}$ ; Sigma), an inhibitor of caveolae-dependent endocytosis filipin complex (2  $\mu\text{g}/\text{mL}$ ; Sigma), and broad endocytosis inhibitor methyl- $\beta$ -cyclodextrin (10 mM; Sigma). For some assays, NK cells were cultured in the hypertonic media containing 0.45 M sucrose (Wako), which inhibits clathrin-dependent endocytosis as described previously (2).

**In Vivo Trogocytosis Assay.** RMA-S ( $5 \times 10^5$ ), RMA/Rae-1 $\delta$  ( $1 \times 10^6$ ), B16 ( $5 \times 10^5$ ), or B16/Rae-1 $\epsilon$  ( $2 \times 10^6$ ) were injected s.c. into WT C57BL/6 mice. Tumor tissues were collected at 2 wk after transplantation and treated with collagenase (200 units/mL; Wako). Tumor-infiltrating lymphocytes were stained with anti-DX5 mAb, and anti-Rae-1 mAb, and Rae-1 expression on DX5<sup>+</sup> cells was analyzed by flow cytometry. As the other model, RMA or RMA/Rae-1 $\delta$  ( $1 \times 10^7$  each) were injected into spleen of Rag-1<sup>-/-</sup> mice. After 2 h, splenocytes were collected and stained with anti-NK1.1 mAb (PK136; BioLegend) and anti-Rae-1 mAb (R&D Systems). Rae-1 expression on NK1.1<sup>+</sup> cells was analyzed by flow cytometry.

**Human NK Trogocytosis Assay.** Peripheral blood mononuclear cells (PBMCs) were isolated by density gradient centrifugation using Separate-L (Muto Pure Chemicals) from healthy donors. Mouse pro B-cell line Ba/F3 cells stably expressing a human NKG2D ligand, MHC class I chain-related molecules A (Ba/F3-MICA) was prepared as previously described (2). PBMC were cocultured with Ba/F3-MICA at a 1:1 ratio for 1 h. PBMCs were also cultured with naturally processed soluble MICA (2,000 pg/mL) for 24 h. Then, cells were stained with anti-CD3 mAb (UCHT1, BioLegend), anti-CD56 mAb (HCD56, BioLegend), and anti-MICA/B mAb (6D4, BioLegend). As for the soluble MICA, the supernatant of confluent cultured BaF3-MICA was harvested, and the concentration was determined by ELISA using Human MICA DuoSet (R&D Systems).

**RT-PCR.** Total RNA was purified from NK cells using Sepasol (Nacalai). Complementary DNAs were synthesized from total RNAs by using oligo(dT) primer (Invitrogen). PCR was performed by using 10-fold serially diluted cDNA templates, AmpliTaq poly (Applied Biosystems). Primer for amplifying *Raet1e* (forward primer 5'-AGA CCT TCC CTG GTG TGA CGT G-3' and reverse primer 5'-TGT CTG CAT TGG GGT ATG AA-3') and *Actb* (forward primer 5'-TCC CTG GGG CAG AGT GGT GAA GAT-3' and reverse primer 5'-ATG GAT GAC GAT ATC GCT GCG CTG-3') were used.

PNAS

1. Cerwenka A, Baron JL, Lanier LL (2001) Ectopic expression of retinoic acid early inducible-1 gene (RAE-1) permits natural killer cell-mediated rejection of a MHC class I-bearing tumor in vivo. *Proc Natl Acad Sci USA* 98(20):11521-11526.
2. Ogasawara K, et al. (2003) Impairment of NK cell function by NKG2D modulation in NOD mice. *Immunitty* 18(1):41-51.

**Statistical Analysis.** For statistical evaluation, a two-tailed, unpaired Student *t* test was used. *P* values <0.05 were considered significant.

| E/T ratio | RMA (% Tumor cell death) | RMA-S (% Tumor cell death) | RMA/Rae-1 $\delta$ (% Tumor cell death) |
|-----------|--------------------------|----------------------------|-----------------------------------------|
| 3         | ~2                       | ~20                        | ~41                                     |
| 10        | ~3                       | ~28                        | ~62                                     |
| 30        | ~5                       | ~38                        | ~68                                     |

**A**

IFN- $\gamma$  (pg/ml)

4000

2000

0

6h 24h

□ control Ig    ■ anti-NKG2D

**B**

% NK cell death

100

50

0

6h 24h

□ control Ig    ■ anti-NKG2D

Figure 2 consists of two bar graphs, A and B. Graph A shows IFN- $\gamma$  levels (pg/ml) on the y-axis (0 to 4000) against time points (6h and 24h) on the x-axis. The legend indicates control Ig (white bars) and anti-NKG2D (black bars). At 6h, both groups show low levels (~500 pg/ml). At 24h, the control Ig group shows a significant increase (~1600 pg/ml), while the anti-NKG2D group shows a much higher level (~2800 pg/ml), marked with \*\* indicating statistical significance. Graph B shows % NK cell death on the y-axis (0 to 100) against time points (6h and 24h) on the x-axis. The legend indicates control Ig (white bars) and anti-NKG2D (black bars). At 6h, both groups show low cell death (~10%). At 24h, both groups show a slight increase in cell death (~15-18%), with no significant difference between them.

Nakamura et al. [www.pnas.org/cgi/content/short/1300140110](http://www.pnas.org/cgi/content/short/1300140110)





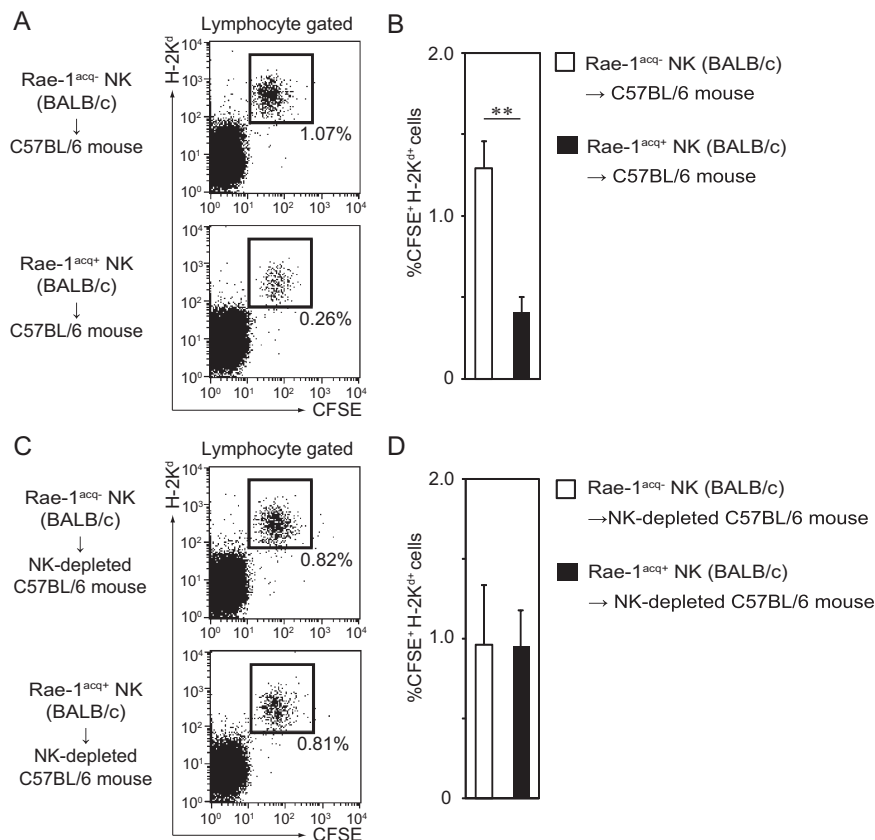

**Fig. S7.** Rae-1-dressed NK cells are eliminated by other NK cells in vivo. CFSE-labeled BALB/c NK cells were cocultured with RMA or RMA/Rae-16 at a 1:1 ratio for 15 min. Then, these NK cells were injected into spleen of C57BL/6 mouse ( $n = 4$  each) (A and B) or C57BL/6 mouse that had been injected with anti-NK1.1 mAb to deplete host NK cells ( $n = 4$  each) (C and D). After 4 h, splenocytes were stained with anti-H-2K<sup>d</sup> mAb. H-2K<sup>d</sup><sup>+</sup> CFSE<sup>+</sup> NK cell population in spleen was analyzed as described in Fig. 5 A and B.  $**P < 0.01$ , compared with Rae-1<sup>acq-</sup> NK cells. Similar results were obtained in two independent experiments.
